# Supplementary material
Source: Springer Nature journal article supplement (https://www.springermedizin.de/resource/supplementary/12875_2009_385_MOESM4_ESM.pdf/9434502)
Supplement: MOESM4 [file 9434502]

**Problems experienced**

**Strategy used**

**Objective**

**Maintaining  
appropriate treatment**

**Relying on the district nurse  
and others to provide treatment**

**Good enough treatment**
